# Supplementary material for: Nutritional benefit of fungal spores for honey bee workers
Source: PubMed Central journal article supplement (PMC7519121; doi:10.1038/s41598-020-72758-1), 2020-09-24
Supplement: 41598_2020_72758_MOESM1_ESM.pdf [file 41598_2020_72758_MOESM1_ESM.pdf]

## Revised Title: Nutritional benefit of fungal spores for honey bee workers

Jorgiane B. Parish, Eileen S. Scott, Katja Hogendoorn\*

School of Agriculture, Food and Wine, The University of Adelaide, Adelaide, South  
Australia 5005, Australia

### Supplementary Information

**Table S1.** Daily consumption of the different diets (mean  $\pm$  standard error) at a mass ratio of 20:1 of pollen and fungal spores during both experiments (Generalized Linear Model).

| Diets                                               | Diet consumption<br>(mg/bee/day) | P-value |
|-----------------------------------------------------|----------------------------------|---------|
| <b><i>Eucalyptus</i> sp. pollen</b>                 |                                  |         |
| <i>Eucalyptus</i> sp. pollen (EP)                   | 2.43 $\pm$ 0.17                  | 0.07    |
| EP + spores of <i>B. cinerea</i>                    | 2.22 $\pm$ 0.16                  |         |
| EP + spores of <i>Cladosporium</i> sp.              | 2.16 $\pm$ 0.16                  |         |
| EP + spores of <i>C. acutatum</i>                   | 2.19 $\pm$ 0.15                  |         |
| <b><i>Eucalyptus</i> sp. and multifloral pollen</b> |                                  |         |
| EP                                                  | 2.65 $\pm$ 0.23                  | 0.49    |
| EP + spores of <i>B. cinerea</i>                    | 2.39 $\pm$ 0.26                  |         |
| EP + spores of <i>Cladosporium</i> sp.              | 2.17 $\pm$ 0.38                  |         |
| EP + spores of <i>C. acutatum</i>                   | 2.18 $\pm$ 0.24                  |         |
| Multifloral pollen (MP)                             | 2.86 $\pm$ 0.27                  |         |
| MP + spores of <i>B. cinerea</i>                    | 3.01 $\pm$ 0.31                  |         |
| MP + spores of <i>Cladosporium</i> sp.              | 2.86 $\pm$ 0.29                  |         |
| MP + spores of <i>C. acutatum</i>                   | 2.50 $\pm$ 0.29                  |         |

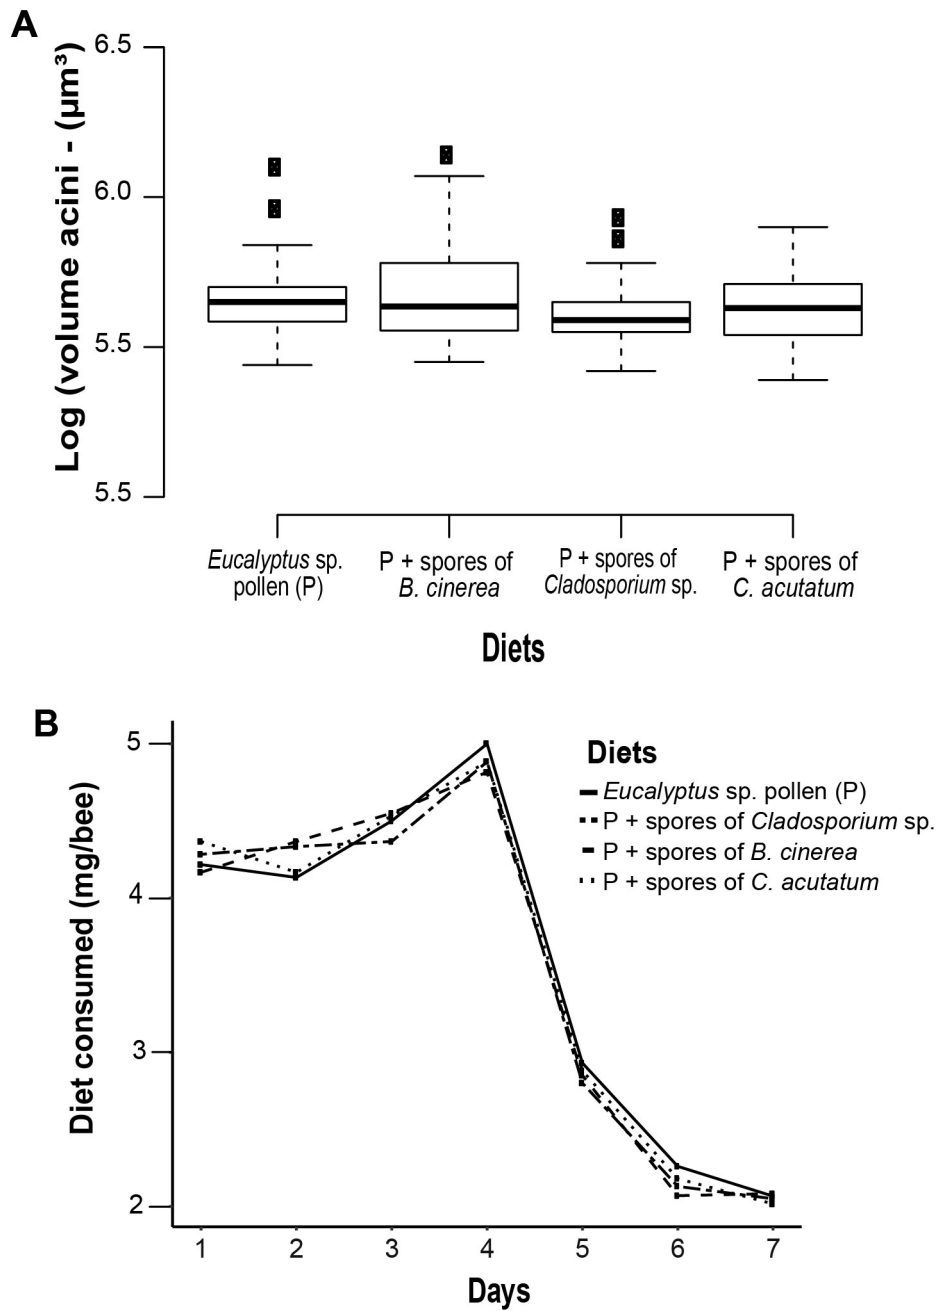

**Figure S1.** Average volume of the acini of the hypopharyngeal gland (A) (ANOVA,  $P > 0.05$ ) and (B) diet consumption of workers fed with *Eucalyptus* sp. pollen alone and *Eucalyptus* sp. pollen supplemented with spores of *Botrytis cinerea*, *Cladosporium* sp. or *Colletotrichum acutatum* at the mass ratio of 20:1 (ANOVA,  $P > 0.05$ ).

**Table S2:** Concentrations of pesticides detected in pollen samples.

| <b>Pesticides</b>             | <i>Eucalyptus</i> sp. | Multifloral |
|-------------------------------|-----------------------|-------------|
| 2-phenylphenol (mg/kg)        | <0.010                | <0.010      |
| Abamectin (mg/kg)             | <0.010                | <0.010      |
| Acephate (mg/kg)              | <0.010                | <0.010      |
| Aldrin (mg/kg)                | <0.010                | <0.010      |
| Atrazine (mg/kg)              | <0.010                | <0.010      |
| Azinphos methyl (mg/kg)       | <0.010                | <0.010      |
| Azoxystrobin (mg/kg)          | <0.010                | <0.010      |
| Benalaxyl (mg/kg)             | <0.010                | <0.010      |
| BHC alpha (mg/kg)             | <0.010                | <0.010      |
| BHC beta (mg/kg)              | <0.010                | <0.010      |
| BHC delta (mg/kg)             | <0.010                | <0.010      |
| BHC gamma (Lindane) (mg/kg)   | <0.010                | <0.010      |
| BHC Total (mg/kg)             | <0.010                | <0.010      |
| Bifenazate (mg/kg)            | <0.010                | <0.010      |
| Bifenthrin (mg/kg)            | <0.010                | <0.010      |
| Bioresmethrin (mg/kg)         | <0.010                | <0.010      |
| Bitertanol (mg/kg)            | <0.010                | <0.010      |
| Boscalid (mg/kg)              | <0.010                | <0.010      |
| Buprofezin (mg/kg)            | <0.010                | <0.010      |
| Captan (mg/kg)                | <0.050                | <0.050      |
| Carbaryl (mg/kg)              | <0.010                | <0.010      |
| Carbendazim / Benomyl (mg/kg) | <0.010                | <0.010      |
| Chlorantraniliprole (mg/kg)   | <0.010                | <0.010      |
| Chlordane (mg/kg)             | <0.010                | <0.010      |
| Chlorfenapyr (mg/kg)          | <0.010                | <0.010      |
| Chlorfenvinphos (mg/kg)       | <0.010                | <0.010      |
| Chlorothalonil (mg/kg)        | <0.050                | <0.050      |
| Chlorpyrifos (mg/kg)          | <0.010                | <0.010      |
| Chlorpyrifos methyl (mg/kg)   | <0.010                | <0.010      |
| Chlorthal dimethyl (mg/kg)    | <0.010                | <0.010      |
| Clofentezine (mg/kg)          | <0.010                | <0.010      |
| Cyfluthrin (mg/kg)            | <0.010                | <0.010      |
| Cyfluthrin beta (mg/kg)       | <0.010                | <0.010      |
| Cyhalothrin (mg/kg)           | <0.010                | <0.010      |
| Cyhalothrin lambda (mg/kg)    | <0.010                | <0.010      |
| Cypermethrin (mg/kg)          | <0.010                | <0.010      |
| Cypermethrin alpha (mg/kg)    | <0.010                | <0.010      |
| Cyproconazole (mg/kg)         | <0.010                | <0.010      |
| Cyprodinil (mg/kg)            | <0.010                | <0.010      |
| DDD p,p (mg/kg)               | <0.010                | <0.010      |

**Table S2 (continued):** Concentrations of pesticides detected in pollen samples.

|                              |        |        |
|------------------------------|--------|--------|
| DDE p,p (mg/kg)              | <0.010 | <0.010 |
| DDT p,p (mg/kg)              | <0.010 | <0.010 |
| DDT Total (mg/kg)            | <0.010 | <0.010 |
| Deltamethrin (mg/kg)         | <0.010 | <0.010 |
| Diazinon (mg/kg)             | <0.010 | <0.010 |
| Dichlorvos (mg/kg)           | <0.010 | <0.010 |
| Dicloran (mg/kg)             | <0.010 | <0.010 |
| Dicofol (mg/kg)              | <0.010 | <0.010 |
| Dieldrin (mg/kg)             | <0.010 | <0.010 |
| Difenoconazole (mg/kg)       | <0.010 | <0.010 |
| Dimethoate (mg/kg)           | <0.010 | <0.010 |
| Dimethoate (Total) (mg/kg)   | <0.010 | <0.010 |
| Dimethomorph (mg/kg)         | <0.010 | <0.010 |
| Diphenylamine (mg/kg)        | <0.010 | <0.010 |
| Disulfoton (mg/kg)           | <0.010 | <0.010 |
| Dithianon (mg/kg)            | <0.1   | <0.1   |
| Diuron (mg/kg)               | <0.010 | <0.010 |
| Endosulphan alpha (mg/kg)    | <0.010 | <0.010 |
| Endosulphan beta (mg/kg)     | <0.010 | <0.010 |
| Endosulphan sulphate (mg/kg) | <0.010 | <0.010 |
| Endosulphan Total (mg/kg)    | <0.010 | <0.010 |
| Endrin Total (mg/kg)         | <0.010 | <0.010 |
| Esfenvalerate (mg/kg)        | <0.010 | <0.010 |
| Ethoprofos (mg/kg)           | <0.010 | <0.010 |
| Etoxazole (mg/kg)            | <0.010 | <0.010 |
| Fenamiphos (mg/kg)           | <0.010 | <0.010 |
| Fenarimol (mg/kg)            | <0.010 | <0.010 |
| Fenhexamid (mg/kg)           | <0.010 | <0.010 |
| Fenitrothion (mg/kg)         | <0.010 | <0.010 |
| Fenoxycarb (mg/kg)           | <0.010 | <0.010 |
| Fenpyroximate (mg/kg)        | <0.010 | <0.010 |
| Fenthion (mg/kg)             | <0.010 | <0.010 |
| Fenvalerate (mg/kg)          | <0.010 | <0.010 |
| Fenvalerate (Total) (mg/kg)  | <0.010 | <0.010 |
| Fipronil (mg/kg)             | <0.010 | <0.010 |
| Flubendiamide (mg/kg)        | <0.010 | <0.010 |
| Flucythrinate (mg/kg)        | <0.010 | <0.010 |
| Fludioxonil (mg/kg)          | <0.010 | <0.010 |
| Flumethrin (mg/kg)           | <0.010 | <0.010 |
| Flusilazole (mg/kg)          | <0.010 | <0.010 |
| Fluvalinate (mg/kg)          | <0.010 | <0.010 |

**Table S2 (continued):** Concentrations of pesticides detected in pollen samples.

|                            |        |        |
|----------------------------|--------|--------|
| Fluvalinate tau (mg/kg)    | <0.010 | <0.010 |
| HCB (mg/kg)                | <0.010 | <0.010 |
| Heptachlor (mg/kg)         | <0.010 | <0.010 |
| Heptachlor epoxide (mg/kg) | <0.010 | <0.010 |
| Hexaconazole (mg/kg)       | <0.010 | <0.010 |
| Hexythiazox (mg/kg)        | <0.010 | <0.010 |
| Imazalil (mg/kg)           | <0.010 | <0.010 |
| Imidacloprid (mg/kg)       | <0.010 | <0.010 |
| Indoxacarb (mg/kg)         | <0.010 | <0.010 |
| Iprodione (mg/kg)          | <0.010 | <0.010 |
| Kresoxim methyl (mg/kg)    | <0.010 | <0.010 |
| Linuron (mg/kg)            | <0.010 | <0.010 |
| Malathion (mg/kg)          | <0.010 | <0.010 |
| Metalaxyl (mg/kg)          | <0.010 | <0.010 |
| Methamidophos (mg/kg)      | <0.010 | <0.010 |
| Methidathion (mg/kg)       | <0.010 | <0.010 |
| Methomyl (mg/kg)           | <0.010 | <0.010 |
| Methomyl Oxime (mg/kg)     | <0.010 | <0.010 |
| Metribuzin (mg/kg)         | <0.010 | <0.010 |
| Mevinphos (mg/kg)          | <0.010 | <0.010 |
| Monocrotophos (mg/kg)      | <0.010 | <0.010 |
| Myclobutanil (mg/kg)       | <0.010 | <0.010 |
| Omethoate (mg/kg)          | <0.010 | <0.010 |
| Oxyfluorfen (mg/kg)        | <0.010 | <0.010 |
| Paclobutrazol (mg/kg)      | <0.010 | <0.010 |
| Parathion ethyl (mg/kg)    | <0.010 | <0.010 |
| Parathion methyl (mg/kg)   | <0.010 | <0.010 |
| Penconazole (mg/kg)        | <0.010 | <0.010 |
| Pendimethalin (mg/kg)      | <0.010 | <0.010 |
| Penthiopyrad (mg/kg)       | <0.010 | <0.010 |
| Permethrin (mg/kg)         | <0.010 | <0.010 |
| Phenothrin (mg/kg)         | <0.010 | <0.010 |
| Phorate (mg/kg)            | <0.010 | <0.010 |
| Phosmet (mg/kg)            | <0.010 | <0.010 |
| Piperonyl butoxide (mg/kg) | <0.010 | <0.010 |
| Pirimicarb (mg/kg)         | <0.010 | <0.010 |
| Pirimiphos methyl (mg/kg)  | <0.010 | <0.010 |
| Prochloraz (mg/kg)         | <0.010 | <0.010 |
| Procymidone (mg/kg)        | <0.010 | <0.010 |
| Profenofos (mg/kg)         | <0.010 | <0.010 |
| Propargite (mg/kg)         | <0.010 | <0.010 |

**Table S2 (continued):** Concentrations of pesticides detected in pollen samples.

|                          |        |        |
|--------------------------|--------|--------|
| Propiconazole (mg/kg)    | <0.010 | <0.010 |
| Prothiofos (mg/kg)       | <0.010 | <0.010 |
| Pymetrozine (mg/kg)      | <0.010 | <0.010 |
| Pyraclostrobin (mg/kg)   | <0.010 | <0.010 |
| Pyrethrins (mg/kg)       | <0.010 | <0.010 |
| Pyrimethanil (mg/kg)     | <0.010 | <0.010 |
| Pyriproxyfen (mg/kg)     | <0.010 | <0.010 |
| Quintozene (mg/kg)       | <0.010 | <0.010 |
| Spinetoram (mg/kg)       | <0.010 | <0.010 |
| Spinosad (mg/kg)         | <0.010 | <0.010 |
| Spirotetramat (mg/kg)    | <0.010 | <0.010 |
| Sulfoxaflor (mg/kg)      | <0.010 | <0.010 |
| Tebuconazole (mg/kg)     | <0.010 | <0.010 |
| Tebufenozide (mg/kg)     | <0.010 | <0.010 |
| Tebufenpyrad (mg/kg)     | <0.010 | <0.010 |
| Terbufos (mg/kg)         | <0.010 | <0.010 |
| Tetradifon (mg/kg)       | <0.010 | <0.010 |
| Thiabendazole (mg/kg)    | <0.010 | <0.010 |
| Thiacloprid (mg/kg)      | <0.010 | <0.010 |
| Thiamethoxam (mg/kg)     | <0.010 | <0.010 |
| Tolclofos methyl (mg/kg) | <0.010 | <0.010 |
| Triadimefon (mg/kg)      | <0.010 | <0.010 |
| Triadimenol (mg/kg)      | <0.010 | <0.010 |
| Trichlorfon (mg/kg)      | <0.010 | <0.010 |
| Trifloxystrobin (mg/kg)  | <0.010 | <0.010 |
| Vinclozolin (mg/kg)      | <0.010 | <0.010 |
